# Supplementary material for: Quantification of hydrogen production by intestinal bacteria that are specifically dysregulated in Parkinson's disease
Source: PLoS One. 2018 Dec 26;13(12):e0208313. doi: 10.1371/journal.pone.0208313 (PMC6306167; doi:10.1371/journal.pone.0208313)
Supplement: S4 Table — (XLSX) [file pone.0208313.s005.xlsx]

## Sheet: Measured, H2 (Fig  1)
Blautia coccoides
Time (hrs)	Cell number (cells/ml)						Hydrogen (µmoles/1ml culture medium)
	Sample #1	Sample #2	Sample #3	Sample #4	Average	SD	Sample #1	Sample #2	Sample #3	Sample #4	Average	SD
0	3.91283e+06	2.44552e+06	2.93462e+06	4.89104e+06	3.546e+06	1.08452e+06	0.072	0.048	0.0257143	0.0445714	0.0475714	0.0190059
2	1.07603e+07	1.07603e+07	1.02712e+07	1.32058e+07	1.12494e+07	1.3245e+06	0.0977143	0.128571	0.217714	0.234857	0.169714	0.0668938
3	2.49443e+07	2.49443e+07	1.90751e+07	2.20097e+07	2.27433e+07	2.80969e+06	0.932571	0.965143	1.10229	1.22571	1.05643	0.134702
4	4.64649e+07	5.13559e+07	4.40194e+07	4.98886e+07	4.79322e+07	3.31727e+06	1.43314	1.47086	1.45371	1.61829	1.494	0.0842794
5	8.85278e+07	1.00755e+08	8.41259e+07	8.95061e+07	9.07288e+07	7.08216e+06	2.10857	2.12571	2.22857	2.31429	2.19429	0.0959592
6	1.78523e+08	1.93196e+08	1.66785e+08	1.75099e+08	1.78401e+08	1.10266e+07	2.91429	2.84571	2.94857	3.01714	2.93143	0.0713714
7	2.23031e+08	2.23031e+08	2.19608e+08	2.26455e+08	2.23031e+08	2.79546e+06	2.79429	2.65714	2.88	2.89714	2.80714	0.109656
8	2.34281e+08	2.43574e+08	2.32324e+08	2.36237e+08	2.36604e+08	4.91341e+06	2.76	2.72571	2.70857	2.72571	2.73	0.021571
Clostridium leptum
Time (hrs)	Cell number (cells/ml)						Hydrogen (µmoles/1ml culture medium)
	Sample #1	Sample #2	Sample #3		Average	SD	Sample #1	Sample #2	Sample #3		Average	SD
0	1.64408e+07	1.04259e+07	1.52379e+07		1.40349e+07	3.18281e+06
1	2.08518e+07	9.62391e+06	1.52379e+07		1.52379e+07	5.61395e+06
2.5	2.92727e+07	1.44359e+07	2.16538e+07		2.17875e+07	7.41933e+06
4.5	3.96986e+07	2.08518e+07	2.84707e+07		2.96737e+07	9.48083e+06
5.25	4.45106e+07	2.64657e+07	3.88966e+07		3.66243e+07	9.23453e+06
6.25	5.77435e+07	3.00747e+07	4.00996e+07		4.26393e+07	1.40081e+07
7	6.29564e+07	3.80946e+07	4.85205e+07		4.98572e+07	1.24847e+07
8	6.93723e+07	3.80946e+07	4.77185e+07		5.17285e+07	1.60198e+07
8.75	6.93723e+07	3.88966e+07	4.77185e+07		5.19958e+07	1.56816e+07
10	8.42092e+07	5.17285e+07	7.37833e+07		6.9907e+07	1.65837e+07
11	9.46351e+07	5.89464e+07	7.81943e+07		7.72586e+07	1.78627e+07
12	1.17492e+08	7.01743e+07	9.10261e+07		9.28975e+07	2.37142e+07
12.75	1.31126e+08	8.54122e+07	1.14284e+08		1.10274e+08	2.31191e+07
13.25	1.43557e+08	8.82192e+07	1.25913e+08		1.1923e+08	2.82676e+07
13.75	1.56389e+08	9.66401e+07	1.31928e+08		1.28319e+08	3.00373e+07
14.5	1.68418e+08	1.07066e+08	1.46765e+08		1.4075e+08	3.11153e+07
15.5	2.10122e+08	1.29923e+08	1.75636e+08		1.71894e+08	4.02304e+07
16.5	2.41801e+08	1.51176e+08	2.0531e+08		1.99429e+08	4.55979e+07
17.25	2.63855e+08	1.62804e+08	2.19345e+08		2.15335e+08	5.06447e+07
18.5	3.00747e+08	1.86864e+08	2.58242e+08		2.48618e+08	5.75482e+07
19.5	3.50471e+08	2.08919e+08	2.97539e+08		2.85643e+08	7.15217e+07
20.75	3.80946e+08	2.40999e+08	3.5408e+08		3.25342e+08	7.42681e+07
21.75	4.23452e+08	2.74281e+08	3.96184e+08		3.64639e+08	7.9431e+07	2.36193	1.64731	2.34906		2.11943	0.408923
22.75	4.43101e+08	3.05559e+08	4.31472e+08		3.93377e+08	7.62747e+07	2.87582	1.83917	2.11673		2.27724	0.536642
23.5	4.59542e+08	3.22401e+08	4.48314e+08		4.10085e+08	7.61442e+07
24.25	4.77185e+08	3.31223e+08	4.57136e+08		4.21848e+08	7.91213e+07	2.6509	1.98402	2.58601		2.40698	0.367725
25	4.98037e+08	3.56486e+08	4.87611e+08		4.47378e+08	7.88876e+07
26	5.30919e+08	3.79342e+08	4.9924e+08		4.69834e+08	7.99526e+07
26.75	5.32924e+08	3.88164e+08	5.16483e+08		4.7919e+08	7.92584e+07
27.5	5.36132e+08	4.1062e+08	5.42548e+08		4.96433e+08	7.43856e+07	3.0023	2.29597	2.93408		2.74412	0.389598
28	5.72623e+08	4.33878e+08	5.5538e+08		5.20627e+08	7.56198e+07
29	5.71019e+08	4.47111e+08	5.69415e+08		5.29181e+08	7.10797e+07	3.76836	2.81124	3.61795		3.39918	0.514694
30	5.85053e+08	4.79591e+08	5.83048e+08		5.49231e+08	6.03181e+07
31	5.87459e+08	4.92824e+08	5.96682e+08		5.58989e+08	5.74853e+07	3.27403	2.99734	3.79132		3.35423	0.403018
32	5.93474e+08	5.233e+08	6.13123e+08		5.76633e+08	4.72206e+07	3.61746	2.84306	4.0058		3.48877	0.591957
33.25	5.91469e+08	5.34528e+08	6.1994e+08		5.81979e+08	4.34898e+07	4.44294	3.70389	4.67019		4.27234	0.505235
34.25	5.93474e+08	5.48162e+08	6.24351e+08		5.88662e+08	3.83219e+07
Escherichia coli
Time (hrs)	Cell number (cells/ml)						Hydrogen (µmoles/1ml culture medium)
	Sample #1	Sample #2	Sample #3		Average	SD	Sample #1	Sample #2	Sample #3		Average	SD
0.5	2.46734e+07	1.38171e+07	1.97388e+07		1.94098e+07	5.43563e+06	0.00368618	0.00408051	0		0.0025889	0.0022507
1.5	1.00668e+08	7.20464e+07	7.99419e+07		8.42187e+07	1.47821e+07	0.00915301	0.00357598	0.0111911		0.00797338	0.00394225
2.5	2.18113e+08	2.00348e+08	2.20087e+08		2.1285e+08	1.08713e+07	0.0384837	0.0883577	0.0310192		0.0526202	0.0311738
3.5	3.33585e+08	3.20755e+08	3.24702e+08		3.26347e+08	6.57135e+06	0.109724	0.0974387	0.102578		0.103247	0.00616975
4.5	4.37213e+08	4.23396e+08	4.29318e+08		4.29976e+08	6.93202e+06	0.266833	0.260217	0.282245		0.269765	0.011303
5.75	4.70769e+08	4.72743e+08	4.76691e+08		4.73401e+08	3.01514e+06	0.345004	0.330257	0.429402		0.368221	0.0534948
6.75	4.72743e+08	4.79652e+08	4.91495e+08		4.81297e+08	9.48351e+06
7	4.87547e+08	4.90508e+08	4.91495e+08		4.8985e+08	2.05447e+06	0.478397	0.525275	0.514109		0.505927	0.0244865
8.5	4.81626e+08	4.98403e+08	4.89521e+08		4.8985e+08	8.39381e+06
9.75	4.80639e+08	4.81626e+08	5.06299e+08		4.89521e+08	1.45385e+07	0.687219	0.683395	0.686365		0.68566	0.00200742
Bacteroides fragilis
Time (hrs)	Cell number (cells/ml)						Hydrogen (µmoles/1ml culture medium)
	Sample #1	Sample #2	Sample #3		Average	SD	Sample #1	Sample #2	Sample #3		Average	SD
0	8.18182e+06	9.71591e+06	2.30114e+07		1.36364e+07	8.15514e+06
1	1.63636e+07	1.73864e+07	2.65909e+07		2.01136e+07	5.63274e+06	0.0531429	0.0582857	0.0462857		0.0525714	0.00602037
2	2.8125e+07	3.01705e+07	3.42614e+07		3.08523e+07	3.12448e+06
3	4.85795e+07	5.36932e+07	5.31818e+07		5.18182e+07	2.81637e+06	0.0788571	0.0977143	0.0737143		0.0834286	0.0126362
4	9.76705e+07	101250000	8.84659e+07		9.57955e+07	6.59507e+06
5	1.55966e+08	1.59034e+08	1.6108e+08		1.58693e+08	2.57381e+06	0.133714	0.162857	0.168		0.154857	0.0184899
6	2.05568e+08	2.18864e+08	2.14261e+08		2.12898e+08	6.75181e+06
7.3	2.55682e+08	2.62841e+08	2.61307e+08		2.59943e+08	3.76932e+06	0.162857	0.159429	0.18		0.167429	0.0110213
8	2.69489e+08	2.72557e+08	2.70511e+08		2.70852e+08	1.56224e+06
9	2.94545e+08	2.98636e+08	2.9608e+08		2.9642e+08	2.06665e+06
9.5	3.04261e+08	3.0733e+08	3.06818e+08		3.06136e+08	1.6438e+06	0.18	0.166286	0.190286		0.178857	0.0120407
10	3.21136e+08	3.24716e+08	3.21648e+08		322500000	1.93599e+06
11	3.35966e+08	3.39545e+08	3.36477e+08		3.3733e+08	1.93599e+06	0.168	0.192	0.192		0.184	0.0138564
12	3.55909e+08	3.6e+08	3.55398e+08		3.57102e+08	2.5225e+06
13	3.69205e+08	3.74318e+08	3.7125e+08		3.71591e+08	2.57381e+06	0.183429	0.188571	0.185143		0.185714	0.00261861
14	3.84034e+08	3.8608e+08	3.84034e+08		3.84716e+08	1.18094e+06
15	393750000	3.9733e+08	3.95284e+08		3.95455e+08	1.79585e+06	0.168	0.18	0.185143		0.177714	0.00879703
16	4.00398e+08	4.08068e+08	405000000		4.04489e+08	3.86071e+06
Bifidobacterium pseudocatenulatum
Time (hrs)	Cell number (cells/ml)						Hydrogen (µmoles/1ml culture medium)
	Sample #1	Sample #2	Sample #3		Average	SD	Sample #1	Sample #2	Sample #3		Average	SD
0	-507561	4.56805e+06	2.99461e+07		1.13355e+07	1.63158e+07
1	3.55293e+06	1.6242e+07	2.99461e+07		1.65803e+07	1.31999e+07
2.75	-5.07561e+06	1.01512e+07	1.67495e+07		7.27505e+06	1.11932e+07
4	3.04537e+06	1.42117e+07	2.43629e+07		1.38733e+07	1.06628e+07
5	8.62854e+06	2.38554e+07	3.45142e+07		2.23327e+07	1.30098e+07
6	3.55293e+07	4.06049e+07	5.27864e+07		4.29735e+07	8.86902e+06	0.0905084	0.00945436	0.00520477		0.0350558	0.0480703
6.75	5.3294e+07	5.7862e+07	7.00435e+07		6.03998e+07	8.65835e+06
7.25	7.51191e+07	7.4104e+07	8.98384e+07		7.96871e+07	8.80586e+06
7.75	7.56267e+07	7.91796e+07	9.08535e+07		8.18866e+07	7.96618e+06
8.5	1.43132e+08	1.30443e+08	1.51253e+08		1.4161e+08	1.04882e+07
9.25	2.29925e+08	2.11146e+08	2.26372e+08		2.22481e+08	9.9763e+06
9.5	2.53273e+08	2.41092e+08	2.46675e+08		2.47013e+08	6.09778e+06	0.0868126	0.0107456	0.009326		0.0356281	0.0443328
10.25	2.61902e+08	2.47182e+08	2.80174e+08		2.63086e+08	1.65276e+07
11.25	3.42604e+08	3.24332e+08	3.3296e+08		3.33299e+08	9.1408e+06
12	3.56308e+08	3.45649e+08	3.54785e+08		3.52248e+08	5.76479e+06
12.5	3.67982e+08	3.64937e+08	3.76103e+08		3.69674e+08	5.77223e+06
13.5	3.98943e+08	3.90315e+08	3.98943e+08		3.96067e+08	4.98169e+06
14.25	4.01989e+08	4.03511e+08	4.01989e+08		4.02496e+08	879122	0.0779104	0.0117136	0.00939089		0.0330049	0.0389066
15.5	4.19246e+08	4.25844e+08	4.27367e+08		4.24152e+08	4.31676e+06
16.5	4.36503e+08	4.35995e+08	4.36503e+08		4.36334e+08	293041
17.5	4.45639e+08	4.49699e+08	4.46654e+08		4.47331e+08	2.11315e+06
18.25	4.45639e+08	4.49699e+08	4.47162e+08		447500000	2.05129e+06
18.75	4.38026e+08	4.39041e+08	4.40056e+08		4.39041e+08	1.01512e+06	0.0911533	0.00518601	0.0122657		0.0362017	0.047721
19.5	4.3092e+08	4.40056e+08	4.42594e+08		4.37856e+08	6.13989e+06
20	4.41071e+08	4.43609e+08	4.44116e+08		4.42932e+08	1.63158e+06	0.107834	0.0155927	0.0152389		0.046222	0.0533583
20.5	4.3701e+08	4.37518e+08	4.40056e+08		4.38195e+08	1.63158e+06
Atopobium parvulum
Time (hrs)	Cell number (cells/ml)						Hydrogen (µmoles/1ml culture medium)
	Sample #1	Sample #2	Sample #3		Average	SD	Sample #1	Sample #2	Sample #3		Average	SD
0	4.90453e+07	5.88544e+07	7.47942e+07		6.0898e+07	1.29955e+07
0.5	4.90453e+07	5.76283e+07	6.74374e+07		5.8037e+07	9.20281e+06
13.25	2.09669e+08	2.19478e+08	3.01629e+08		2.43592e+08	5.05002e+07
13.75	2.52584e+08	2.63619e+08	3.50674e+08		2.88959e+08	5.37311e+07
14	2.67297e+08	2.70976e+08	3.60483e+08		2.99585e+08	5.27713e+07
14.5	2.77106e+08	2.83237e+08	3.81328e+08		3.1389e+08	5.84828e+07
15.25	3.23699e+08	3.23699e+08	4.41408e+08		3.62936e+08	6.79592e+07
15.75	3.69066e+08	3.71518e+08	5.06393e+08		4.15659e+08	7.85874e+07
17	5.16202e+08	5.12524e+08	6.62112e+08		5.63613e+08	8.53228e+07	0.0113047	0.0129587	0.0174478		0.0139037	0.00317873
17.5	5.3582e+08	5.39499e+08	6.87861e+08		5.87727e+08	8.67383e+07
18	5.8364e+08	5.77509e+08	7.60203e+08		6.4045e+08	1.03754e+08
19	7.34454e+08	7.22193e+08	9.07339e+08		7.87995e+08	1.03536e+08
19.5	8.04344e+08	8.00665e+08	9.82133e+08		8.62381e+08	1.03725e+08
20.25	8.96304e+08	8.93851e+08	1.06796e+09		9.52706e+08	9.98226e+07	0.0233209	0.0243896	0.0203819		0.0226975	0.0020753
20.75	9.53932e+08	9.28183e+08	1.10229e+09		9.94803e+08	9.3976e+07
21.5	1.0508e+09	1.04221e+09	1.19425e+09		1.09575e+09	8.54109e+07
22	1.10965e+09	1.09739e+09	1.23717e+09		1.14807e+09	7.74052e+07
22.5	1.18567e+09	1.17096e+09	1.30093e+09		1.21919e+09	7.11721e+07
23	1.24943e+09	1.23717e+09	1.35978e+09		1.28213e+09	6.75302e+07
23.5	1.31319e+09	1.29848e+09	1.42109e+09		1.34425e+09	6.69488e+07
23.75	1.33526e+09	1.32177e+09	1.44071e+09		1.36591e+09	6.51237e+07	0.0194898	0.0258462	0.0180409		0.0211256	0.0041518
24	1.33771e+09	1.32055e+09	1.45174e+09		1.37e+09	7.13093e+07
24.5	1.36837e+09	1.3279e+09	1.47013e+09		1.3888e+09	7.32848e+07
25	1.37817e+09	1.37817e+09	1.44806e+09		1.40147e+09	4.03508e+07	0.0232075	0.0270677	0.0236261		0.0246338	0.0021182
25.25	1.36714e+09	1.36959e+09	1.46155e+09		1.39943e+09	5.3815e+07
Lactobacillus casei
Time (hrs)	Cell number (cells/ml)						Hydrogen (µmoles/1ml culture medium)
	Sample #1	Sample #2	Sample #3		Average	SD	Sample #1	Sample #2	Sample #3		Average	SD
0	1.8068e+07	1.54868e+07	1.32744e+07		1.56098e+07	2.39914e+06
1.25	1.73305e+07	1.51181e+07	1.31515e+07		1.52001e+07	2.0907e+06
2	1.72076e+07	1.48723e+07	1.33974e+07		1.51591e+07	1.92125e+06
3.25	1.74534e+07	1.49952e+07	1.35203e+07		1.5323e+07	1.98696e+06
4	1.76993e+07	1.51181e+07	1.43806e+07		1.57327e+07	1.74257e+06
5	1.73305e+07	1.59785e+07	1.41348e+07		1.58146e+07	1.60414e+06
6	1.74534e+07	1.51181e+07	1.31515e+07		1.5241e+07	2.15358e+06
7	1.73305e+07	1.41348e+07	1.33974e+07		1.49542e+07	2.0907e+06
9	1.6716e+07	1.56098e+07	1.45036e+07		1.56098e+07	1.1062e+06
10	1.72076e+07	1.41348e+07	1.31515e+07		1.48313e+07	2.11584e+06
11	1.75763e+07	1.45036e+07	1.29057e+07		1.49952e+07	2.37381e+06
12	1.76993e+07	1.45036e+07	1.29057e+07		1.50362e+07	2.44075e+06
13	1.76993e+07	1.41348e+07	1.27828e+07		1.48723e+07	2.53984e+06
14	1.74534e+07	1.43806e+07	1.29057e+07		1.49133e+07	2.32017e+06
16	1.68389e+07	1.54868e+07	1.26599e+07		1.49952e+07	2.13243e+06
24	8.99712e+07	8.35798e+07	7.30094e+07		8.21868e+07	8.56626e+06
24.75	1.10006e+08	1.04106e+08	9.35356e+07		1.02549e+08	8.34471e+06
25.5	1.34711e+08	1.2918e+08	1.19224e+08		1.27705e+08	7.84807e+06
27	1.62489e+08	1.57573e+08	1.52287e+08		1.5745e+08	5.10194e+06
28.5	1.9039e+08	1.87317e+08	1.84859e+08		1.87522e+08	2.77119e+06
30.9	2.17553e+08	2.15587e+08	2.13743e+08		2.15628e+08	1.90546e+06
32.25	2.27632e+08	2.27632e+08	2.24928e+08		2.26731e+08	1.56119e+06
33	2.28615e+08	2.29967e+08	2.28615e+08		2.29066e+08	780593
34	2.35744e+08	2.32549e+08	2.32671e+08		2.33655e+08	1.8106e+06
34.75	2.36236e+08	2.35375e+08	2.36605e+08		2.36072e+08	630733	0	0	0		0	0
36	2.41152e+08	2.39309e+08	2.3808e+08		2.39513e+08	1.5466e+06
37	2.42136e+08	2.42381e+08	2.4189e+08		2.42136e+08	245823
38	2.43611e+08	2.4484e+08	2.45331e+08		2.44594e+08	886327

## Sheet: Summary, H2 (Fig 2)
Estimated hydrogen production by Mehods I and II
	hydrogen/bacteria (nmols/1E+08 cells) (Method I)		hydrogen/bacterial area(nmols/1E+08 cells/hour) (Method II)
	Mean	SD	Mean	SD
B.coccoides	1649.1	130.24	812.75	63.78
C.leptum	616.93	29.13	44.87	8.57
B.fragilis	55.47	4.01	8.77	0.61
Enterobacteriaceae	77.74	10.82	23.76	3.27
Bifidobacterium	8.21	9.68	1.45	1.74
Atopobium	2.41	0.44	0.38	0.09
Lactobacillus	0	0	0	0

## Sheet: Predicted, H2 (Fig 3)
Sample No.	PD/Control	Clostridium coccoides group	C. leptum subgroup	Bacteroides fragilis group	Bifidobacterium	Atopobium cluster	Prevotella	C. perfringens	Total Lactobacillus	L. gasseri subgroup	L. brevis	L. casei subgroup	L. fermentum	L. plantarum subgroup	L. reuteri subgroup	L. ruminis subgroup	L. sakei subgroup	Enterobacteriaceae	Enterococcus	Staphylococcus	Pseudomonas	Log of predicted hydrogen production (umoles) / stool (g) / hr
1	C	9.64867	9.65488	9.42421	8.26493	9.51065	6.22091	2.3	7.047	6.42364	2.3	4.96791	5.82862	2.3	6.88644	4.3272	3.50185	8.13243	4.58816	4.52027	3.3	4.58547
2	P	9.26395	9.71791	9.42077	10.3167	8.79255	5	2.3	8.41626	7.3459	2.3	8.13573	6.4851	5.77882	7.93877	7.05681	3	7.34439	7.53502	4.37932	3.3	4.25063
3	C	9.4889	10.4404	9.35184	10.5103	9.31892	5	2.3	6.96304	6.96237	2.3	3.2	3.9	3.48421	2.3	2.3	3	5.392	5.86715	4.96132	4.14297	4.58093
5	P	9.11633	9.78311	9.3817	10.8082	9.64458	8.70813	2.3	9.22005	8.87717	5.30732	6.28802	8.22196	7.3489	8.80494	7.77039	7.2511	7.21377	6.95017	4.17894	3.3	4.16178
6	P	9.84261	10.418	9.62749	9.66098	9.38447	8.02112	4.0127	7.84069	5.97041	3.99533	3.2	3.9	3.99383	2.3	4.14901	7.83452	6.33307	4.17752	4.20847	3.3	4.83736
7	P	8.94708	10.0942	9.13111	10.9003	9.69503	6.69184	3.58755	9.34462	8.69244	2.3	6.16274	8.99257	6.4341	8.60805	8.51307	3	8.17129	7.22778	3.94437	3.3	4.14913
8	C	9.99031	9.64888	9.99137	8.9116	8.89521	6.33383	2.3	6.76759	6.73727	2.3	3.2	3.9	2.50894	5.56004	4.30681	3.153	5.55908	7.10937	4.48749	3.3	4.9157
9	P	8.64129	8.37747	8.49449	9.85224	9.72122	6.65349	7.14231	8.12386	6.06018	3.51124	6.94274	5.26745	4.45774	4.47341	8.08934	3	7.06656	8.09627	5.37591	3.3	3.58192
10	C	9.89348	10.4632	10.5452	9.40191	7.82868	6.73495	2.3	4.6754	2.6	2.3	3.2	3.9	2.3	4.40673	2.3	4.05396	6.00367	5.60557	4.13868	3.47652	4.90172
11	P	8.84692	10.2451	8.71203	9.53209	8.99317	5	5.40515	7.53876	6.98423	2.3	5.68526	5.83083	2.3	7.37594	3.46087	3	6.68624	6.91667	4.56343	3.3	4.13683
12	P	9.78435	10.1107	9.92039	10.3946	8.9396	7.68862	2.3	6.56846	6.38299	3.28803	5.14047	5.85275	5.47919	5.0532	2.3	4.29138	7.62115	6.04711	4.63242	3.3	4.75098
13	P	9.29963	9.88637	9.14289	9.46339	9.69799	6.08361	6.16482	9.75613	9.32736	4.50776	4.72796	8.23093	6.52713	9.00547	9.37877	3	7.88842	7.92079	6.53964	3.3	4.29794
14	C	10.0665	10.6908	10.2491	10.3302	9.95451	6.86669	3.02663	7.94029	7.3843	2.3	3.2	6.71874	3.94054	7.58975	7.27417	3	7.12677	6.8644	6.00035	4.7308	5.07424
15	P	8.68018	9.77549	9.15442	9.26003	8.06535	7.52467	2.48022	5.0394	2.6	2.3	3.2	3.9	3.94704	4.95094	2.3	3	6.90643	5.25227	4.13931	3.3	3.82747
16	C	9.97081	10.7979	9.87879	10.3397	9.56528	10.0269	2.3	5.10454	2.6	2.3	3.2	3.9	4.73123	2.3	3.73855	4.76009	6.39524	4.82633	4.99071	4.43481	5.02188
17	P	9.00423	10.0214	8.67058	7.56027	9.36565	9.31059	2.3	6.55734	6.46125	2.3	3.2	5.46617	4.71429	5.56696	2.3	3	8.7353	5.55123	3	6.0385	4.11728
18	C	9.47025	10.0375	9.39466	10.4101	9.83839	6.31603	2.3	5.71374	5.69854	2.3	3.2	3.9	3.82367	2.3	2.3	3	7.7253	6.46467	4.07797	3.3	4.47015
19	P	7.9447	9.36571	7.40472	10.0928	9.56628	7.54014	2.4576	6.40586	6.25403	3.40041	4.11391	3.9	4.88362	5.17345	5.69993	3	6.17015	5.66102	4.71982	3.3	3.29084
20	C	9.84921	10.6571	9.70354	10.1166	9.59586	6.46272	2.3	6.85767	6.79324	2.3	3.2	3.9	2.95119	5.98492	2.3	4.22404	7.68901	6.95298	4.54447	3.3	4.89469
21	C	9.51526	10.4719	8.39415	9.23285	9.56483	10.4886	6.77235	6.43207	5.78403	2.3	3.2	3.9	3.66068	6.29012	5.11576	3	7.88423	6.558	4.15917	3.3	4.60207
22	P	8.85852	9.73627	8.85429	10.2313	9.56476	5	5.64005	10.2962	9.5815	6.10684	7.47138	9.24653	7.64508	10.0292	9.53518	3	8.14458	8.43132	3.39149	3.3	3.93802
23	P	9.73601	10.2218	9.73646	6.79976	9.61859	6.33507	2.3	8.16353	5.96895	2.3	3.94536	7.39527	5.33255	7.15418	8.02304	4.05281	6.33524	6.73124	4.24207	6.218	4.71791
24	C	8.88127	9.82288	9.03975	8.52275	8.69962	5.60248	2.3	8.2678	6.90469	2.3	5.336	6.58796	5.23427	6.95451	8.21477	3	6.93684	7.2962	5.83345	3.3	3.96721
26	C	9.84738	10.4755	9.97226	6.6222	9.11978	6.54279	2.3	5.57416	2.6	2.3	3.2	5.42557	2.3	4.69794	2.3	4.74992	8.71357	6.43958	4.5642	3.3	4.85464
27	P	9.41069	9.8665	8.72587	8.10521	9.9821	9.24635	2.3	6.03065	5.43334	4.06482	3.2	5.83571	3.59864	4.99344	2.3	3	5.44698	5.98288	3.28866	3.3	4.38576
28	P	9.61153	10.0564	8.98289	8.04938	8.70381	10.1063	3.90932	6.44325	4.91908	2.3	3.2	5.02486	2.47781	5.62112	6.16181	5.85403	7.0192	6.15898	4.42902	4.40885	4.58464
29	C	9.4753	10.2094	9.77247	10.1872	9.2887	6.57801	2.3	7.57404	6.49348	2.3	3.2	3.9	2.3	7.49839	6.45607	4.08702	7.92657	5.3716	4.38365	4.47014	4.50945
30	P	9.9549	10.4908	9.80704	10.1964	9.58277	5.36703	4.48938	6.77706	6.7104	2.3	4.95289	5.35042	2.72489	5.36772	5.46552	4.07206	8.92113	8.74227	5.35544	3.3	4.94524
31	C	10.1254	10.693	10.3209	7.78145	9.25564	7.50415	5.68396	5.75202	5.06423	2.3	3.2	4.01138	2.3	5.62313	4.19434	3.09461	8.38263	8.48003	4.70178	3.3	5.12227
32	P	9.30441	10.3798	9.76244	10.6066	9.91372	5	2.3	7.17054	5.82566	2.93341	6.89846	3.9	2.3	6.79172	4.39364	3	6.27228	5.47821	4.89018	3.3	4.45131
33	C	9.95378	10.6146	9.51941	9.33208	9.87339	11.1025	7.80685	8.25824	7.34889	2.51752	7.8439	7.90764	5.06845	6.90574	2.96268	4.9474	8.62402	7.98929	5.71564	4.48907	4.96377
34	P	9.09983	10.0203	8.93294	8.58061	8.67322	10.0925	5.36946	9.73529	8.81625	4.09605	6.13789	7.76384	6.92158	9.23682	9.47541	3	9.1917	8.14888	4.53078	3.3	4.18701
35	C	9.63154	10.6379	7.5918	10.0833	9.94368	10.4663	3.68263	5.39781	2.6	2.3	3.2	3.9	2.3	4.42882	2.96288	5.326	7.8399	4.66446	4.19131	3.3	4.73652
36	P	8.41267	9.56533	8.39734	10.1534	10.2197	8.30994	2.3	7.56415	6.85955	4.2524	5.19137	6.39581	4.62634	6.72237	7.3312	3	7.20661	6.07039	5.76975	3.3	3.60706
37	C	9.76405	10.862	9.55228	9.70875	9.76959	10.7432	8.88046	8.3189	8.0402	5.73225	5.50074	3.9	5.65294	7.68491	2.3	7.69005	9.01648	7.28044	5.11614	5.41287	4.9059
38	P	9.37213	10.5496	9.19728	10.5774	9.80875	5	5.52209	7.99396	6.92132	2.3	5.01362	5.5205	5.51982	6.46838	7.93715	4.62515	6.9417	6.64808	4.48119	3.3	4.55349
39	P	9.50684	10.5095	8.99874	9.43612	10.1135	6.29719	2.3	8.38009	7.71936	2.3	5.49155	7.20687	5.71998	7.57472	8.12395	3	8.03346	6.74496	5.04238	5.3404	4.6108
40	C	8.60609	9.49336	8.65511	9.11634	9.24312	6.77921	2.3	5.95708	5.08544	2.3	3.49556	5.07498	3.99597	5.03957	5.73363	3	5.85685	4.39846	4.86298	3.3	3.67616
42	P	8.95484	4.9	9.18252	9.56467	10.0873	6.45006	4.84382	9.81414	2.6	3.92072	5.75779	9.0051	2.3	9.46053	9.41805	3	4	8.07176	5.44177	3.3	3.87839
43	P	9.29793	9.94314	9.65252	9.94818	9.08454	5	2.09357	9.08855	8.65586	6.23362	7.7925	8.41203	8.4578	8.21614	2.70445	3.25528	8.5839	6.37143	6.73779	4.00375	4.31586
44	C	10.2192	11.0286	9.80129	10.3418	10.293	5	4.01022	7.92593	7.73098	5.39801	4.4126	5.57004	7.47279	5.15718	2.3	3.17725	8.46747	6.84327	4.97631	5.48768	5.26385
45	P	9.08706	9.84417	8.3794	8.19856	9.3741	7.21592	2.3	7.91557	6.72761	3.45313	3.2	5.61178	4.25039	6.83333	7.84352	3	6.33908	6.54813	5.10624	3.3	4.11723
46	C	9.6267	9.92144	8.30077	10.5339	9.76834	5	5.66095	7.16665	6.70603	4.59709	3.2	3.9	4.96147	6.9443	5.81802	3	7.53329	6.67855	5.01845	3.3	4.58768
47	C	9.98969	10.2332	10.2545	10.0171	10.3619	6.54741	2.3	7.29028	3.89783	2.3	7.28857	3.9	2.3	4.75068	3.52672	3	6.83209	5.28888	6.03872	3.3	4.94871
49	P	9.50972	10.4893	9.83908	10.2324	9.60045	5	6.15373	8.78407	8.59951	2.3	7.38645	7.87742	3.77121	8.04459	2.3	3	9.18094	6.63012	5.01639	3.3	4.61654
50	C	9.5	10.7	10	10.6	10.2	6.5		7.1937	6.4	2.3	6.3	6.5	2.3	6.9	3.9	3	7.6	6.9	5.8	3.3	4.6965
51	P	9.5	10.5	9.6	10.7	9.7	6.1	3.2	7.71896	7	2.3	5.5	6.3	5.1	7.3	7.3	4.1	7.5	6.8	5.1	3.3	4.61274
52	C	9.5	10	9.3	8.6	8.9	9.5	5	6.91872	6.2	2.3	3.5	3.9	5.3	6.6	6.4	4.1	8.7	6.2	6.7	3.3	4.48418
53	P	8.5	8.9	8.6	8.4	8.3	9.9	3.2	7.45286	5.8	2.3	3.2	4.8	4.3	6.4	7.4	4.4	7.9	7.1	3.6	3.3	3.47491
54	C	9.9	10.3	10	10.2	9.3		2.3	6.6372	6.6	2.3	3.2	3.9	2.3	5.5	2.3	4.6	6.2	3.9	6.9	3.3	4.8729
56	P	9.4	10.2	9	11.2	9.7	10.3	4.4	8.8013	8.5	6.4	4.4	3.9	7	8.3	7.9	7.4	6.8	7.2	3.6	3.3	4.47625
57	C	9.5	10	10.1	8.2	9.5	5.3	5.6	8.42242	7.4	2.3	5.9	7.5	6.2	8.1	7.9	4.7	7.7	8.2	5.1	6	4.49581
58	P	9.3	9.8	9.1	10.1	9.4	5.2	3.9	9.13472	7.9	2.3	7.5	7.8	6.3	8.6	8.8	8.2	7.4	9	7	3.3	4.28683
59	P	10.1	10.1	10	8	9.9		2.3	8.17693	7.4	2.3	3.6	8	2.3	7.4	4.2	4.5	6.9	8.7	4	5.6	5.03694
61	C	10.5	10.9	10.1	9.9	9.4	10.4	2.3	6.3627	5.3	2.3	3.4	6.1	3.6	5.5	5.6	5.1	6.8	5.6	3.2	3.3	5.46818
62	P	9.2	9.6	9.6	10.3	9.3	5.6	3.3	9.0453	8.3	2.3	5.7	7.9	3.1	8.8	8.3	3.7	7.5	7.8	3.8	3.3	4.18531
63	P	9.7	10.2	9	8.6	10.1	9	2.3	8.13293	7.1	2.3	8	5.8	3.1	7	7.1	3	8.3	6.3	3.2	3.3	4.68155
64	C	10.3	10.3	10.5	7.6	7.2		2.3	7.39733	2.8	2.3	7.3	3.9	2.3	6.7	2.3	3	9.1	7.4	3.1	3.3	5.24103
65	C	10.5	10.2	10.6	10.7	9.3	7.3	2.3	6.01935	5.3	2.3	3.2	3.9	3.2	5.9	2.3	4.7	6.8	5.6	3	5.1	5.42871
66		9.9	9.8	10.6	10.6	9.2	6.3	2.3	5.26871	2.6	2.3	3.2	3.9	2.3	5.1	4.3	4.6	7.8	7.9	3	4.1	4.8542
68	P	8.4	8.5	8.1	10.7	9.8	7.2	3.7	7.7249	7.5	2.3	6	5.7	2.3	7.3	2.3	3	7	8	3.4	3.3	3.4697
69	C	9.3	9.1	10.2	10.5	9.8	6.2	2.3	5.61244	5.2	2.3	3.2	3.9	2.3	5.4	2.3	3	6.6	5.9	3.9	3.3	4.27082
71	C	9.7	10.4	9.6	7	9.1	6	2.3	5.9173	5.1	2.3	3.2	3.9	2.3	5.3	5.7	3	7.5	7	4.1	3.3	4.71906
73	P	9.2	9.9	8.7	9.9	9.1	10.2	6	8.5374	7.1	2.3	3.2	7.2	2.3	8.5	2.3	3	8	8	4.4	3.3	4.22099
74	P	9.9	10.6	10	10	9.4		4.2	7.43923	7.4	2.3	4.6	5	5.3	6.3	2.3	4.6	6.8	6.4	4.4	3.3	4.92146
75	C	9.2	9.9	8.9	9.5	9.5	9.8	2.3	8.5091	6.6	2.3	3.2	5.3	3.3	6.4	8.5		8.1	7.4	3.7	3.3	4.22019
76	P	9.7	10.7	9.6	10.1	9.4	5.5	2.3	6.76282	6.6	2.3	3.2	4.1	5.1	6.2	4.9	3.9	7.4	5.7	3.5	3.3	4.80463
77	P	9.5	10.2	10.1	10.9	9.2		2.3	7.53302	7.5	2.3	6.3	5.6	2.3	5	3.7	3	7.1	9.3	5.2	3.3	4.54508
78	C	9.4	10.3	9.8	10.6	9.3		4.6	7.02061	7	2.3	3.1	5.5	4	5.2	2.3	3	8.3	7.4	5	3.3	4.4851
79	P	9.2	9.9	8.8	6.9	8.8		2.3	7.06329	6.3	3	4.6	4.9	2.3	6.1	6.9	5.4	7.4	8.7	4.2	5.2	4.21773
80	P	8.7	9.5	9.1	10.8	9.9	6.9	2.3	7.89646	7.4	2.3	6.1	7.1	2.3	7.6	2.3	4	7	7.6	4.4	3.3	3.8164
81	P	8.9	9.9	9.5	10.8	8.6		2.3	7.75612	6.5	3.5	7.2	3.9	4	7.2	6.8	7.2	6.1	6.9	3	3.3	4.04987
82	P	9.9	10.8	10.3	10.4	9.8	6	4.4	8.03899	7.4	2.3	5.4	7.1		7.6	7.5	3	7.5	7.1	3.1	3.1	4.97781
84	P	10.3	10.1	10.5	6.7	9.4	6	2.3	7.11597	4.8	4.4		3.9	3.6	5.5	4.8	7.1	7.6	6.6	3.2	3.3	5.232
85	P	9.9	6.4	9.9	11	10.2		2.3	6.24468	5.7	2.3	6	3.9	2.3	4.9	4.7	5.1	6.8	7.7	4.1	4.7	4.82459
86	C	10	9.7	10	10.8	9.9	6	3.8	9.00907	7.1	5.1	6.5	6.4	9	6.4	4.1	5.3	9.2	9.7	3.5	3.3	4.93311
87	C	9.7	10.5	9.4	9.6	9.7	10.2	7.2	8.90219	6.6	2.3	4.2	3.9	4.3	8.9	2.3	3.6	7.8	6.5	4.1	4.2	4.74223
88	P	9.3	8.7	10.3	9.5	9.5	5.8	5.9	9.40545	7.5	2.3	4.9	3.9	3.1	9.4	2.3	3	7	6.9	4.5	3.3	4.2613

## Sheet: Predicted, H2, raw (S1 Fig)
	Index	ERR365835	ERR365836	ERR365837	ERR365838	ERR365839	ERR365840	ERR365841	ERR365842	ERR365843	ERR365844	ERR365845	ERR365846	ERR365847	ERR365848	ERR365849	ERR365850	ERR365851	ERR365852	ERR365853	ERR365854	ERR365855	ERR365856	ERR365857	ERR365858	ERR365859	ERR365860	ERR365861	ERR365862	ERR365863	ERR365864	ERR365865	ERR365866	ERR365867	ERR365868	ERR365869	ERR365870	ERR365871	ERR365872	ERR365873	ERR365874	ERR365875	ERR365876	ERR365877	ERR365878	ERR365879	ERR365880	ERR365881	ERR365882
	PD or Control	CO	CO	CO	CO	CO	CO	CO	CO	CO	CO	CO	CO	CO	CO	CO	CO	CO	CO	CO	CO	CO	CO	CO	CO	CO	CO	CO	CO	CO	CO	CO	CO	CO	CO	CO	CO	CO	CO	CO	CO	CO	CO	CO	CO	CO	CO	CO	CO
	Country	Finland	Finland	Finland	Finland	Finland	Finland	Finland	Finland	Finland	Finland	Finland	Finland	Finland	Finland	Finland	Finland	Finland	Finland	Finland	Finland	Finland	Finland	Finland	Finland	Finland	Finland	Finland	Finland	Finland	Finland	Finland	Finland	Finland	Finland	Finland	Finland	Finland	Finland	Finland	Finland	Finland	Finland	Finland	Finland	Finland	Finland	Finland	Finland
Hydrogen production	Gender	male	male	female	male	female	male	male	male	male	female	female	female	female	male	male	female	female	male	male	female	male	male	male	female	male	female	male	male	female	female	female	male	female	male	male	female	male	female	male	male	female	female	female	female	male	male	female	female
0.000145381	D_0__Bacteria;D_1__Actinobacteria;D_2__Actinobacteria;D_3__Bifidobacteriales;D_4__Bifidobacteriaceae	0	0	0	0	0	0	0	0	0	0	0	0	0	0	0	0	0	0	0	0	0	0	0	0	0	0	0	0	0	0	0	0	0	0	0	0	0	0	0	0	0	0	0	0	0	0	0	0
4e-05	D_0__Bacteria;D_1__Actinobacteria;D_2__Coriobacteriia;D_3__Coriobacteriales;D_4__Coriobacteriaceae	0.000265934	0	0	0.00143691	0	0.000487377	0	0.000526824	0	0.00239784	0.00296277	0.00202293	0.00184226	0	0	0.0036566	0.00221692	0.000915937	0.00308764	0.00217843	0	0	0	0	0	0	0.000582694	0.00200259	0.00453846	0	0	0	0	0	0	0	0.00080608	0.00115989	0	0.00387926	0.00299202	0.00195258	0	0.0010846	0	0.00299022	0	0.00127814
	D_0__Bacteria;D_1__Bacteroidetes;D_2__Bacteroidia;D_3__Bacteroidales;D_4__Bacteroidaceae	0.185179	0.233075	0.130791	0.0853166	0.149817	0.0583878	0.135754	0.164808	0.313485	0.103407	0.104212	0.0393026	0.13909	0.0650903	0.166251	0.119873	0.55116	0.163953	0.124931	0.0268343	0.054252	0.359349	0.0738749	0.0597565	0.299433	0.319344	0.218899	0.0574862	0.0423846	0.226236	0.497805	0.0695839	0.0230241	0.170595	0.164395	0.290716	0.0429526	0.0722698	0.250755	0.153352	0.0901762	0.0152487	0.0593229	0.104845	0.169722	0.0954572	0.361468	0.0418235
	D_0__Bacteria;D_1__Bacteroidetes;D_2__Bacteroidia;D_3__Bacteroidales;D_4__Bacteroidales S24-7 group	0	0	0	0	0	0.109367	0	0	0.000722648	0	0.016102	0	0	0	0	0	0	0.00183187	0.00308764	0	0	0.00676819	0.0136762	0.00112144	0	0	0	0.0209683	0	0	0.00449301	0	0	0	0.042965	0	0.00506679	0	0	0	0	0.0004649	0	0.0547722	0	0	0	0
	D_0__Bacteria;D_1__Bacteroidetes;D_2__Bacteroidia;D_3__Bacteroidales;D_4__Porphyromonadaceae	0.0537186	0.0311472	0.037599	0.00790301	0.0197598	0.0431816	0.0216169	0.0225656	0.0151756	0.0285743	0.037872	0.0132935	0.0252159	0.0494533	0.0319392	0.00985692	0	0.0480358	0.0248595	0.0065353	0.0117998	0.0236887	0.029924	0.00913169	0.0538062	0.0160785	0.0235991	0.0148427	0.0156923	0.0444071	0.0460533	0.0218795	0.0169651	0.023569	0.0383647	0.0750962	0.0140488	0.00901142	0.0980195	0.0378228	0.0565991	0.0338447	0.0107591	0.0241323	0.0306717	0.080621	0.0311708	0.0291131
	D_0__Bacteria;D_1__Bacteroidetes;D_2__Bacteroidia;D_3__Bacteroidales;D_4__Prevotellaceae	0.0777413	0	0.00402847	0.221464	0	0.0598499	0	0.0676969	0.00953895	0	0	0.00019266	0	0	0.00645027	0.418283	0	0.0531244	0	0	0.31656	0.00666244	0.0478083	0.32778	0.0581494	0	0	0.0737425	0.00630769	0	0	0.712877	0.248283	0	0	0.028912	0.250691	0.0554069	0	0.0490969	0.00548537	0	0.239957	0.00135575	0	0	0	0
	D_0__Bacteria;D_1__Bacteroidetes;D_2__Bacteroidia;D_3__Bacteroidales;D_4__Rikenellaceae	0.00673699	0.00940291	0.00268565	0.0282892	0.0296397	0.00740813	0.00367488	0.0230925	0.00361324	0.108402	0.00850187	0.00558713	0.00690846	0.0105517	0.00551394	0.0100159	0.00102319	0.0152656	0.0165466	0.035152	0.0040689	0.0109983	0.0112215	0.00688882	0.0135119	0.00395778	0.00922599	0.0559548	0.00792308	0.00552088	0.0152149	0	0.00134644	0.00617284	0.0182276	0.0135173	0.00345463	0.0109743	0.00973481	0.00763729	0.0246842	0.0228731	0.0493535	0.00289226	0.00865319	0.0151811	0.00591494	0.0116452
	D_0__Bacteria;D_1__Firmicutes;D_2__Bacilli;D_3__Lactobacillales;D_4__Enterococcaceae	0	0	0	0	0	0	0	0	0	0	0	0	0	0	0	0	0	0	0	0	0	0	0	0	0	0	0	0	0	0	0	0	0	0	0	0	0	0	0	0	0	0	0	0	0	0	0	0
	D_0__Bacteria;D_1__Firmicutes;D_2__Bacilli;D_3__Lactobacillales;D_4__Lactobacillaceae	0	0	0	0	0	0	0	0	0	0.00049955	0	0.00105963	0	0	0	0	0	0	0	0	0.00108504	0	0.0114553	0	0	0	0	0.000353399	0	0	0	0	0	0	0	0	0	0.000802998	0	0	0	0	0	0	0	0	0	0
	D_0__Bacteria;D_1__Firmicutes;D_2__Bacilli;D_3__Lactobacillales;D_4__Streptococcaceae	0	0	0.000402847	0.00233498	0	0.000292426	0	0	0	0.000999101	0.000901713	0.00154128	0	0	0.0235123	0	0	0	0.00910458	0	0.00745965	0	0	0	0	0.00577177	0	0.00141359	0.00284615	0.00192031	0	0	0	0.003367	0.00477389	0.00168966	0.000575772	0.00115989	0	0.0260638	0.00374003	0.00827522	0.00217155	0.00135575	0	0	0.00215942	0.00610665
	D_0__Bacteria;D_1__Firmicutes;D_2__Clostridia;D_3__Clostridiales;D_4__Christensenellaceae	0.0730432	0.0108134	0.0794951	0.00404131	0.00545098	0.0121844	0.0460441	0.022829	0.00867177	0.0564492	0.0846322	0.035353	0.00932642	0.0141114	0.0432792	0.00127186	0	0.0890495	0.0361808	0.150213	0.0154618	0.0310914	0.117943	0.0139378	0.00108578	0.000824538	0.000874041	0.0561904	0.0426154	0.0648104	0	0	0.0269288	0.0592031	0.0512976	0.0782878	0.0149701	0.0361349	0.00872776	0.0457025	0.0273438	0.0773594	0.0321785	0.0643529	0.0219328	0.0286371	0.00178387	0.134772
0.0812753	D_0__Bacteria;D_1__Firmicutes;D_2__Clostridia;D_3__Clostridiales;D_4__Lachnospiraceae	0.196348	0.220146	0.335169	0.256758	0.239758	0.403938	0.335603	0.318553	0.229224	0.178339	0.170295	0.179559	0.351871	0.261632	0.300146	0.219873	0.221351	0.189497	0.166574	0.116843	0.242642	0.251692	0.235769	0.222365	0.216552	0.335175	0.344275	0.132171	0.201846	0.195271	0.129582	0.088594	0.226875	0.349888	0.292162	0.197503	0.274643	0.173626	0.225243	0.225846	0.224568	0.357415	0.150627	0.171909	0.302519	0.26153	0.308516	0.0761912
0.00449	D_0__Bacteria;D_1__Firmicutes;D_2__Clostridia;D_3__Clostridiales;D_4__Ruminococcaceae	0.287829	0.449342	0.304686	0.283431	0.498595	0.21893	0.307609	0.236456	0.31334	0.428315	0.453562	0.67219	0.366149	0.36715	0.301706	0.118601	0.158424	0.337065	0.499881	0.479651	0.220806	0.229378	0.343074	0.233579	0.214501	0.265831	0.292415	0.416892	0.601154	0.381421	0.131114	0.0554161	0.292312	0.334175	0.269247	0.243875	0.321165	0.345914	0.223901	0.359801	0.325881	0.371734	0.336492	0.293926	0.259767	0.359287	0.173223	0.302634
	D_0__Bacteria;D_1__Firmicutes;D_2__Erysipelotrichia;D_3__Erysipelotrichales;D_4__Erysipelotrichaceae	0.0023934	0.0038787	0.00590842	0.0211944	0.00604719	0.00341164	0.0115651	0.00456581	0.00607024	0.00259766	0.0100477	0.00761006	0.00771445	0.00597508	0.00863504	0.0036566	0	0.00264604	0.0114797	0.0247549	0.00434016	0.00782572	0.0167154	0.0096123	0.00301605	0.00412269	0.00339905	0.0128401	0.0108462	0.00504081	0.00510569	0	0.00807863	0.00420875	0.0042531	0.00835445	0.00172731	0.0135617	0.00671366	0.0111529	0.0157081	0.0158066	0.00937716	0.00741142	0.00462646	0.0040253	0.00732326	0.00894696
	D_0__Bacteria;D_1__Firmicutes;D_2__Negativicutes;D_3__Selenomonadales;D_4__Acidaminococcaceae	0.017463	0	0.0122197	0.0188595	0.0132016	0	0	0.00131706	0.0648938	0	0	0.0131972	0.0102476	0.00114416	0.00260092	0	0	0.0283941	0.0363392	0.030201	0.00203445	0.0323604	0	0	0.0840873	0.020531	0	0	0	0	0.0741346	0.00233142	0	0	0	0	0	0	0	0.0237605	0.0548537	0.00632264	0.0259599	0.0445589	0.0135367	0	0	0.00759781
	D_0__Bacteria;D_1__Firmicutes;D_2__Negativicutes;D_3__Selenomonadales;D_4__Veillonellaceae	0.0287209	0.0239774	0	0.00484957	0.00255515	0.0233941	0.0277778	0.052419	0	0.0207813	0.00991885	0	0.0257916	0.0527587	0.0118602	0.0771065	0.0216576	0	0	0	0.0520819	0	0.0201052	0.0398911	0	0.00239116	0.0308828	0	0.0324615	0.0420067	0.0284897	0.0315638	0.0368924	0.0322671	0.00711744	0.00713414	0.0292492	0.0287295	0.128231	0	0.00049867	0.00548582	0	0	0.0108807	0.0100058	0.0382124	0
	D_0__Bacteria;D_1__Verrucomicrobia;D_2__Verrucomicrobiae;D_3__Verrucomicrobiales;D_4__Verrucomicrobiaceae	0	0	0	0	0	0	0	0	0	0	0	0	0	0	0	0	0	0.000407083	0.000395851	0	0	0	0	0	0	0	0	0.000588998	0.00107692	0	0	0	0	0	0	0.000375481	0	0	0	0	0.000166223	0	0	0	0	0	0	0.00113612
0.0024	D_0__Bacteria;D_1__Proteobacteria;D_2__Gammaproteobacteria;D_3__Enterobacteriales;D_4__Enterobacteriaceae	0.00567326	0.00282087	0	0.00233498	0	0	0.00302637	0	0	0	0	0	0	0.000889906	0.0486891	0	0	0	0.00657113	0.0160412	0	0	0	0	0	0	0	0	0.00661538	0	0.0052078	0	0.0206005	0.00308642	0.00980818	0.00628931	0	0.00990364	0	0	0.0516124	0.00409112	0	0.207068	0.144277	0	0	0.0818008
	Sum of the 18 bacterial families	0.935112	0.984603	0.912985	0.938213	0.964824	0.940832	0.892672	0.91483	0.964735	0.930762	0.899008	0.970908	0.944157	0.828757	0.950583	0.982194	0.955832	0.930185	0.939039	0.888405	0.932592	0.959814	0.921566	0.924063	0.944143	0.974027	0.924153	0.845447	0.976308	0.966635	0.9372	0.982245	0.901306	0.986532	0.902613	0.951751	0.959351	0.758655	0.951326	0.944114	0.884309	0.920874	0.916198	0.979664	0.966587	0.857734	0.929772	0.703046
0.000877058	Bacteroides excluding Prevotella	0.245634	0.273625	0.171076	0.121509	0.199216	0.218345	0.161046	0.210466	0.332996	0.240384	0.166688	0.0581832	0.171215	0.125095	0.203704	0.139746	0.552183	0.229086	0.169424	0.0685216	0.0701207	0.400804	0.128697	0.0768984	0.366751	0.33938	0.251724	0.149252	0.066	0.276164	0.563566	0.0914634	0.0413357	0.200337	0.263953	0.37933	0.0655228	0.0922555	0.35851	0.198812	0.171459	0.0724314	0.119435	0.186641	0.209047	0.191259	0.398554	0.0825818
	Predicted total hydrogen production	0.0174796	0.0201567	0.028759	0.0222529	0.0218998	0.0340047	0.0288059	0.0271368	0.0203292	0.0166286	0.0160236	0.0176629	0.0303927	0.0230246	0.0260446	0.0185255	0.019186	0.0171158	0.0159473	0.0117488	0.0207737	0.0218378	0.0208154	0.019189	0.0188851	0.0287327	0.0295148	0.0127451	0.0191782	0.0178255	0.0116273	0.00752954	0.0198375	0.0301208	0.0252095	0.0174949	0.0238212	0.0157694	0.0196265	0.0201457	0.0199894	0.0307915	0.0138578	0.0159524	0.0262833	0.023037	0.026202	0.00782009
[truncated: 434 more columns]

## Sheet: Predicted, H2, summary (S1 Fig)
Finland			Alabama
Control	PD		Control	PD
0.836206	1.75903		0.677	0.21
0.964273	1.6006		0.909	0.266
1.3758	0.529689		0.509	0.486
1.06455	0.812608		0.462	0.16
1.04766	0.672867		1.842	1.14
1.62674	0.748153		0.564	0.237
1.37804	0.568272		0.495	1.752
1.29819	0.728446		0.41	0.551
0.972525	0.977001		0.628	0.215
0.795495	1.62181		2.123	1.281
0.766549	0.911144		0.428	1.015
0.844974	1.10988		0.479	0.578
1.45395	1.03725		0.816	0.19
1.10147	0.406874		0.881	0.442
1.24594	0.694939		1.074	0.311
0.886236	0.985596		1.439	0.716
0.917838	0.564611		1.203	0.269
0.818801	0.46648		0.699	0.331
0.762902	1.37323		0.47	0.551
0.562048	0.753145		0.8	1.294
0.99379	1.72073		1.402	0.414
1.04469	0.761066		0.507	0.99
0.995786	0.954408		0.311	0.302
0.917977	1.18254		1.739	0.528
0.903441	1.61505		0.871	0.196
1.37454	0.924798		1.394	0.276
1.41195	0.875539		1.039	0.73
0.609709	1.16027		0.555	1.277
0.917464	0.818581		1.084	0.478
0.852752	1.00933		0.98	0.633
0.556238	0.944382		1.139	0.316
0.360204	0.941837		1.217	1.498
0.949003	0.846377		0.742	1.064
1.44094	0.972518		0.953	0.497
1.20599	0.908935		1.232	1.278
0.836936	1.19115		3.479	0.188
1.13958	0.447996		1.226	1.895
0.754389	0.564197		1.32	0.418
0.938907	1.10187		0.259	0.135
0.963746	1.15138		0.934	0.331
0.956269	1.10995		1.624	0.501
1.47303	0.58712		0.774	0.889
0.662942	1.21605		0.915	0.129
0.763143	0.855012		1.014	0.856
1.25736	1.05948		2.852	0.387
1.10206	0.684232		1.508	0.344
1.25347	0.297136		0.733	0.968
0.374104	1.08879		1.499	0.559
0.993177	1.24149		1.082	0.199
0.820041	0.524066		0.962	0.646
0.625931	0.652978		1.911	0.421
1.11318	1.2585		0.272	1.92
1.06539	1.21346		0.369	1.468
1.07569	1.54447		0.539	0.711
1.11366	0.580225		1.013	0.534
0.907781	0.70254		1.046	0.8
1.07056	0.996947		0.345	0.621
1.12871	0.765962		2.193	1.29
0.975738	1.01725		1.549	1.093
0.787606	0.325038		1.224	0.744
0.80921	0.633895		0.331	0.385
1.32624	0.554732		0.592	1.611
0.901717	0.582006		0.849	0.498
0.858744	0.965948		1.481	0.148
1.05429	0.605575		1.037	0.93
0.791931	0.970408		0.697	0.938
0.967302	0.34763		0.627	0.297
1.41773	0.425477		1.312	1.277
1.41419	0.944248		1.055	1.597
1.21816	1.24231		1.048	1.145
0.68682	1.36616		0.829	1.392
1.50457	0.261325		0.839	0.366
0.751228	1.15027		0.36	0.863
0.889779	1.04946		1.434	1.116
			1.13	1.098
			2.197	0.582
			0.821	0.512
			1.045	0.305
			1.31	1.483
			1.092	0.734
			1.031	1.512
			0.553	0.374
			0.819	1.373
			0.645	0.214
			0.863	0.912
			0.616	0.97
			0.423	0.626
			1.235	0.155
			1.442	0.376
			0.643	0.705
			0.456	1.191
			0.547	0.344
			1.85	0.601
			0.54	0.379
			0.613	1.325
			0.208	1.486
			0.715	1.663
			1.057	1.32
			0.54	1.523
			0.507	0.378
			0.714	1.062
			1.326	1.073
			2.036	0.519
			0.382	0.807
			1.092	1.402
			0.723	0.431
			0.92	1.041
			0.712	0.996
			0.865	0.417
			1.424	1.567
			2.191	0.797
			0.642	0.796
			1.832	1.254
			1.856	1.504
			0.921	0.738
			0.544	1.271
			0.379	0.314
			1.639	1.239
			1.175	1.255
			0.671	0.724
			1.194	0.585
			0.913	0.651
			0.919	0.651
			1.241	1.11
			1.825	2.007
			1.753	0.565
			1.072	0.99
			0.312	0.189
			1.175	0.462
			0.759	0.339
			0.438	0.395
			0.258	0.614
				0.694
				0.733
				1.157
				1.35
				0.156
				1.244
				1.047
				0.633
				1.248
				0.193
				2.057
				1.05
				0.351
				0.651
				0.617
				0.227
				0.461
				0.875
				0.226
				0.448
				0.613
				0.506
				0.786
				0.755
				0.581
				1.231
				2.087
				0.579
				0.53
				0.608
				0.429
				1.396
				0.214
				0.215
				0.855
				0.736
				0.876
				0.662
				1.452
				0.69
				0.574
				0.5
				0.57
				1.239
				0.666
				0.202
				1.302
				0.759
				0.698
				0.977
				0.239
				0.939
				1.495
				0.22
				0.261
				0.609
				0.419
				0.11
				0.417
				0.809
				1.018
				0.693
				0.89
				0.395
				0.841
				0.804
				0.914
				0.318
				1.258
				0.693
